# Supplementary material for: Dichlorodioxomolybdenum(vi) complexes bearing oxygen-donor ligands as olefin epoxidation catalysts
Source: Royal Society of Chemistry journal article supplement (doi:10.1039/c5dt02165k), 2015-01-01
Supplement: c5dt02165k1.pdf [file c5dt02165k1.pdf]

## Electronic supplementary information

Manuscript for *Dalton Trans.*

### Dichlorodioxomolybdenum(VI) complexes bearing oxygen-donor ligands as olefin epoxidation catalysts

Tânia S. M. Oliveira,<sup>a</sup> Ana C. Gomes,<sup>b</sup> André D. Lopes,<sup>\*,a</sup> João P. Lourenço,<sup>a,c</sup> Filipe A. Almeida Paz,<sup>b</sup> Martyn Pillinger,<sup>b</sup> Isabel S. Gonçalves<sup>\*,b</sup>

<sup>a</sup> Faculty of Science and Technology, CIQA, University of the Algarve, Campus de Gambelas, 8005-136 Faro, Portugal. E-mail: adlopes@ualg.pt

<sup>b</sup> Department of Chemistry, CICECO - Aveiro Institute of Materials, University of Aveiro, Campus Universitário de Santiago, 3810-193 Aveiro, Portugal. E-mail: igoncalves@ua.pt

<sup>c</sup> CQE - Centro de Química Estrutural, Instituto Superior Técnico, Av. Rovisco pais, 1049-001 Lisboa, Portugal

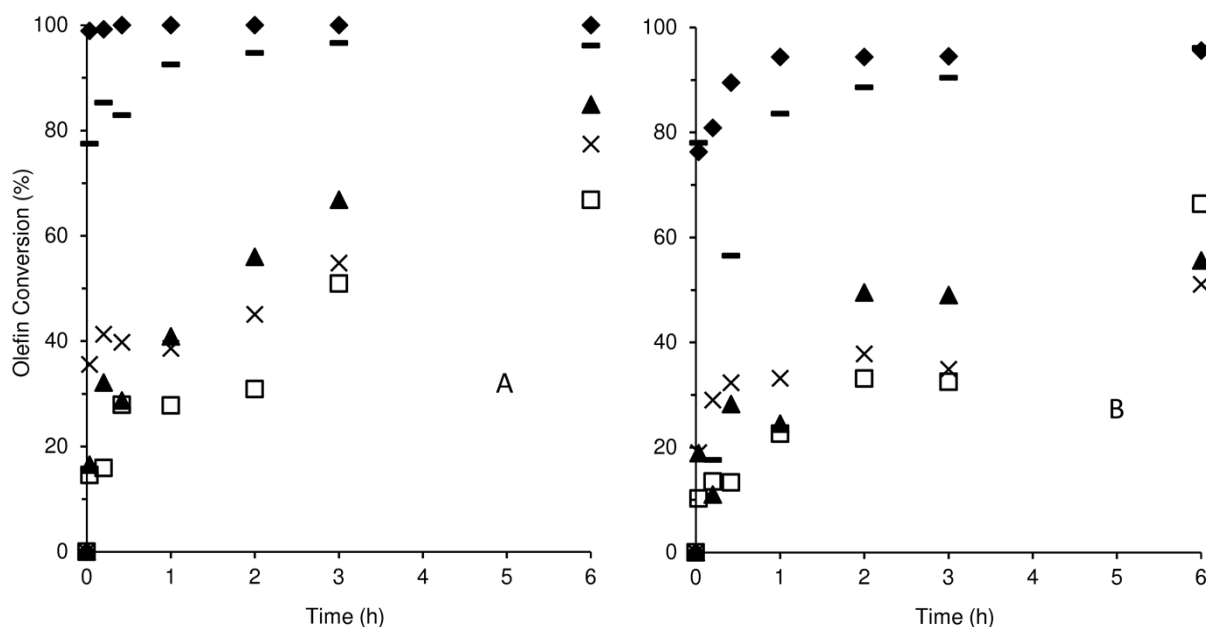

**Fig. S1** Oxidation of *cis*-cyclooctene (◆), 1-octene (□), *trans*-2-octene (▲),  $\alpha$ -pinene (×) and (*R*)-(+)-limonene (—) with TBHP using complexes 2 (A) and 3 (B) as catalyst precursors at 55 °C, without cosolvent.
